# Supplementary material
Source: PubMed Central journal article supplement (PMC3807404)
Supplement: JVI.00381-13_zjv999098043so2.pdf [file JVI.00381-13_zjv999098043so2.pdf]

**Legend to supplemental figure S1.** Phylogenetic analysis in a maximum likelihood framework (PhyML) of the hemagglutinin HA1 genome segment of porcine influenza A viruses of subtype H1(N2) detected in selected swine herds in the Northwest of Germany, 2009 - 2012. Tree is drawn to scale as indicated by the scale bar. EpiFlu database accession numbers can be retrieved from supplemental Table S1b. Further sequences have been extracted from GenBank or the EpiFlu databases and their accession numbers are indicated in the trees. Details of the phylogenetic analysis are given in the Methods section.

Supplemental figure 1.

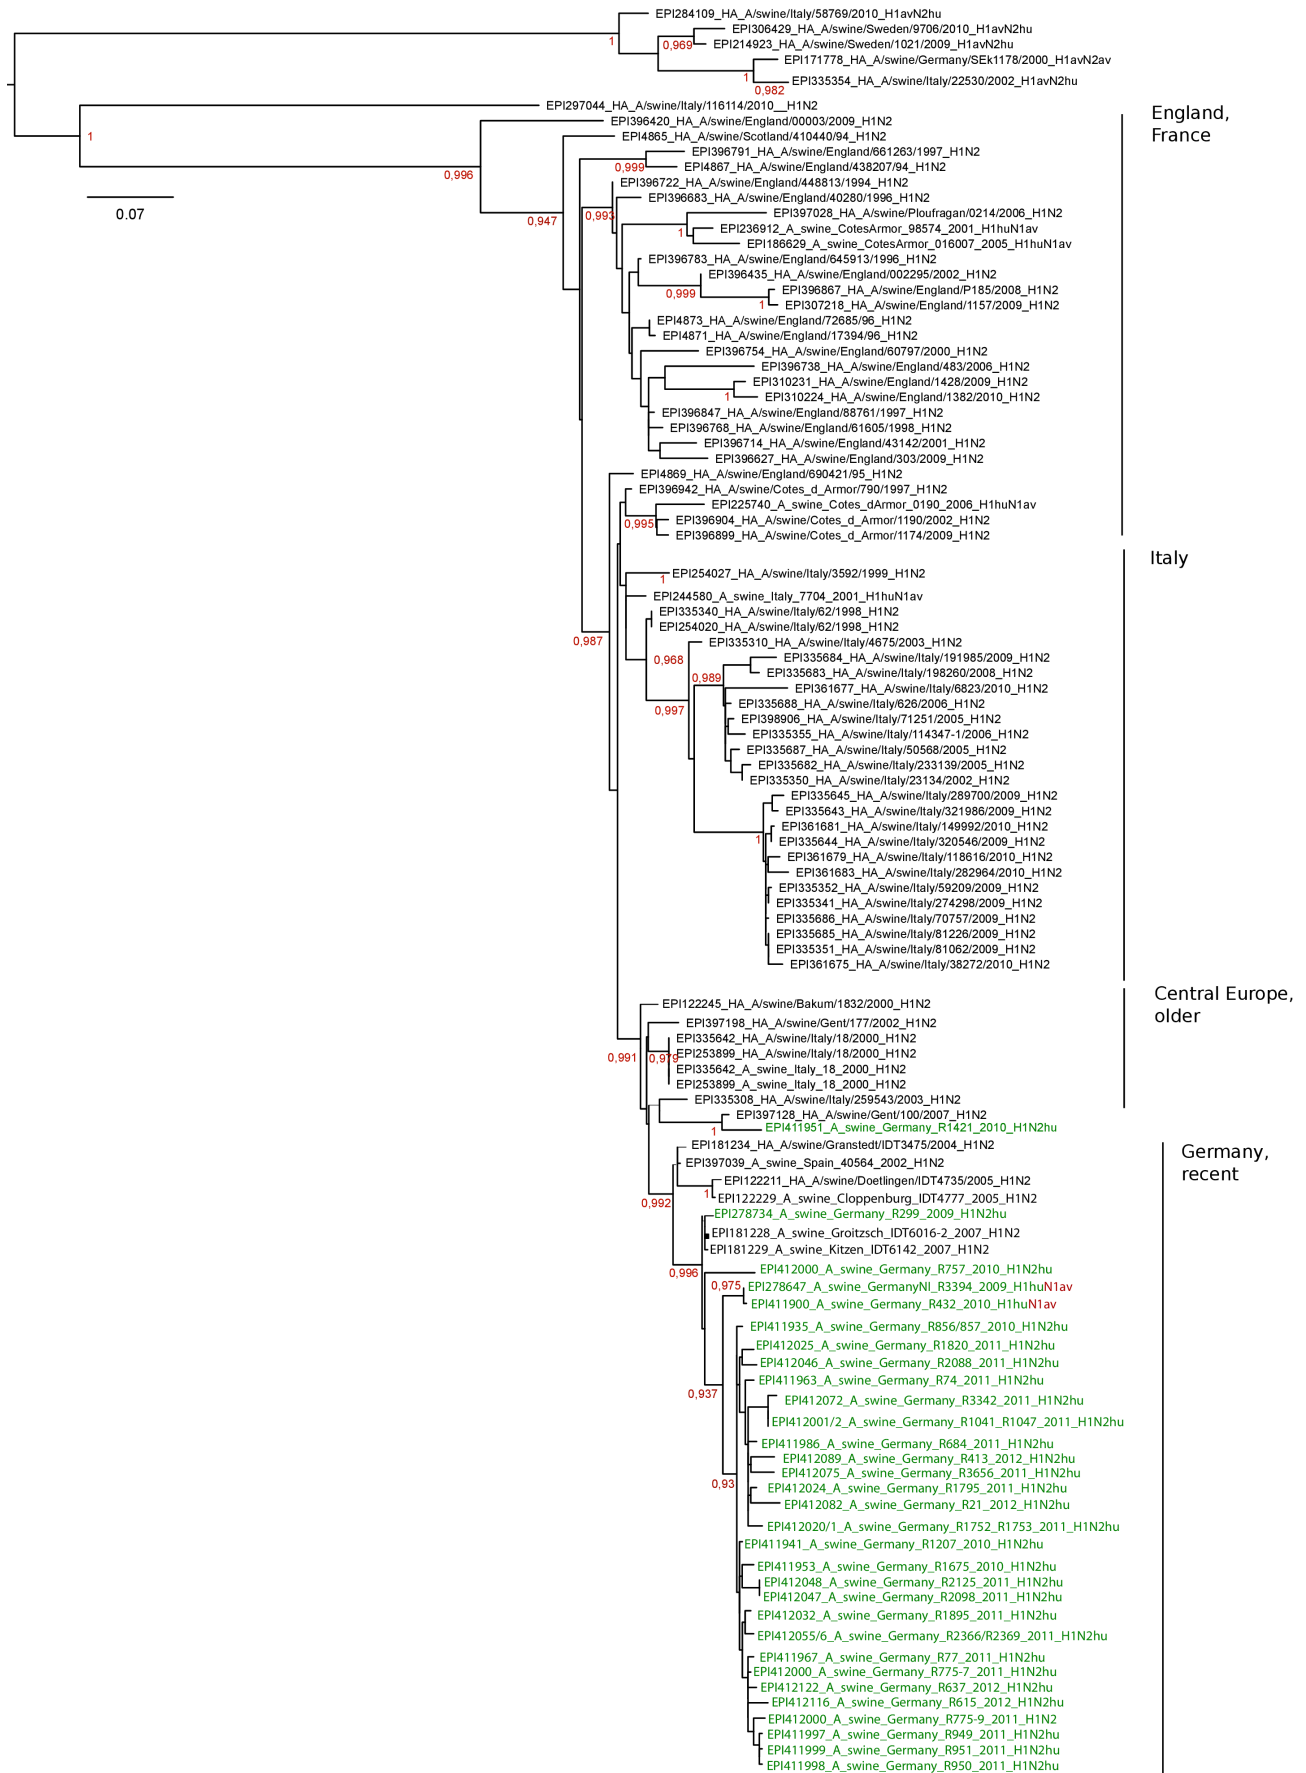

**Legend to supplemental figure S2.** Phylogenetic analysis in a maximum likelihood framework (PhyML) of “internal” genome segments of porcine influenza A viruses detected in selected swine herds in the Northwest of Germany, 2009 - 2011. Trees are drawn to scale as indicated by the scale bar. Isolates analyzed in the frame of this study are shown in blue; genotyping of these isolates on basis of the phylogenetic analyses is presented in Table 2. EpiFlu database accession numbers can be retrieved from supplemental Table 1Sb. Further sequences have been extracted from GenBank or the EpiFlu databases and their accession numbers are indicated in the trees. Details of the phylogenetic analysis are given in the Methods section. A – PB2, B – PB1, C – PA, D – NP, E – M, F – NS.

Supplemental figure 2A.

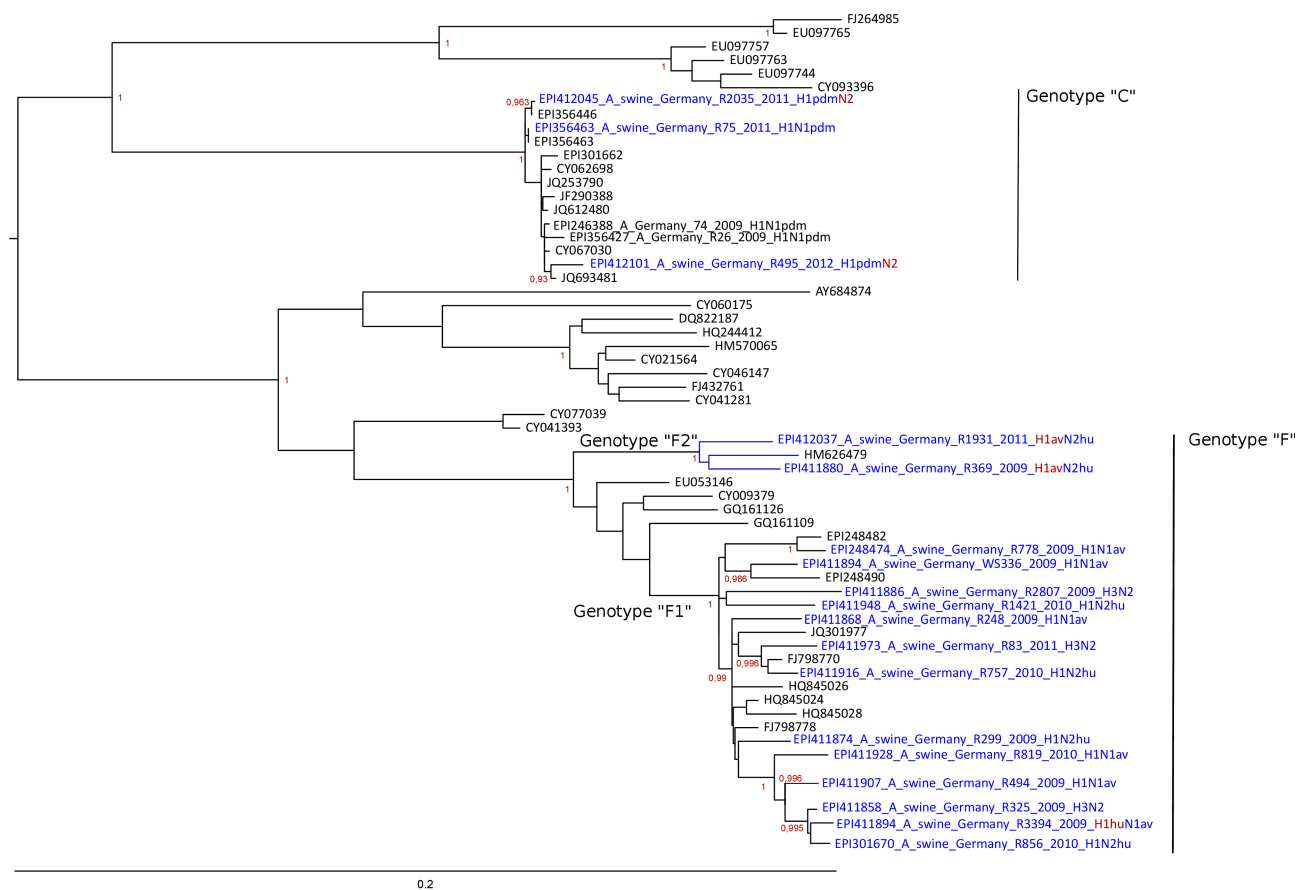

Supplemental figure 2B.

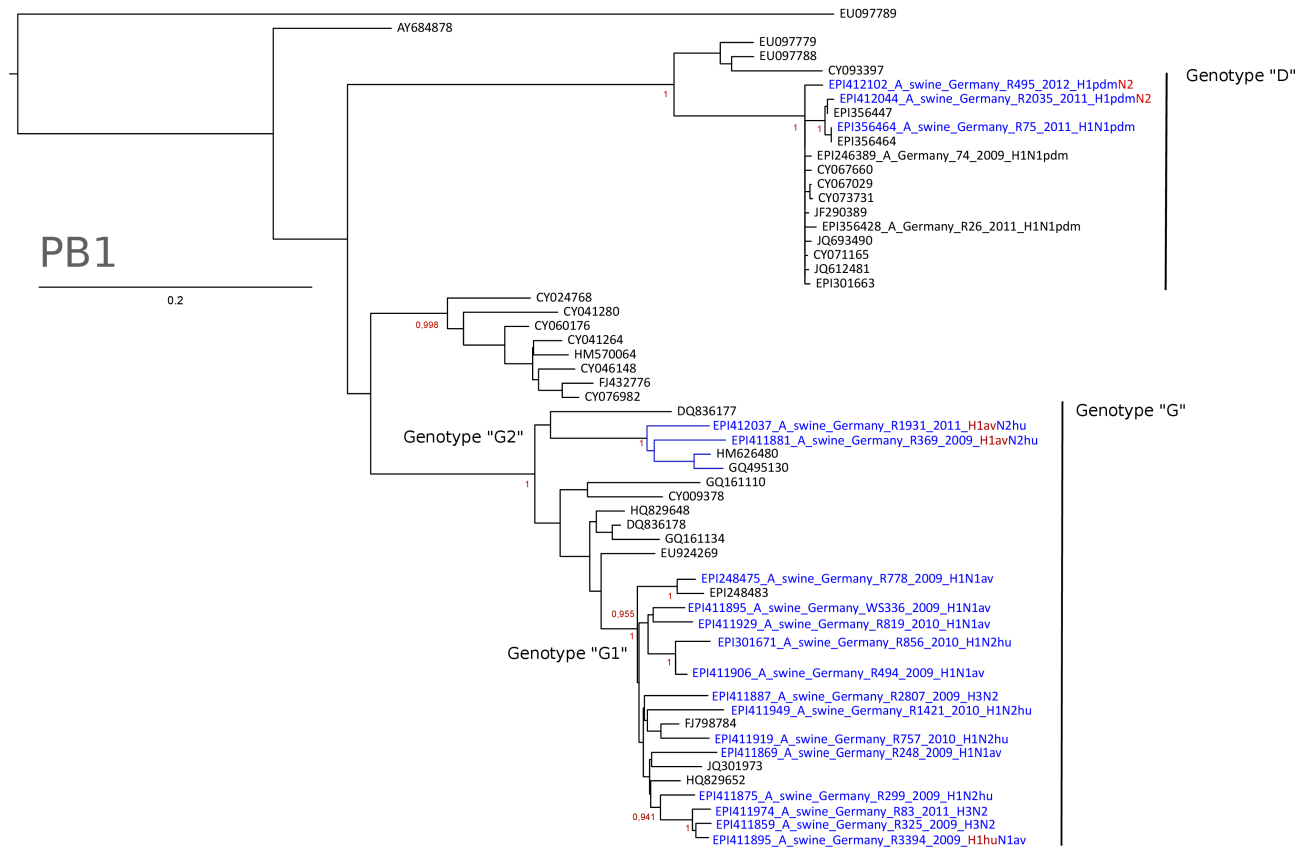

Supplemental figure 2C.

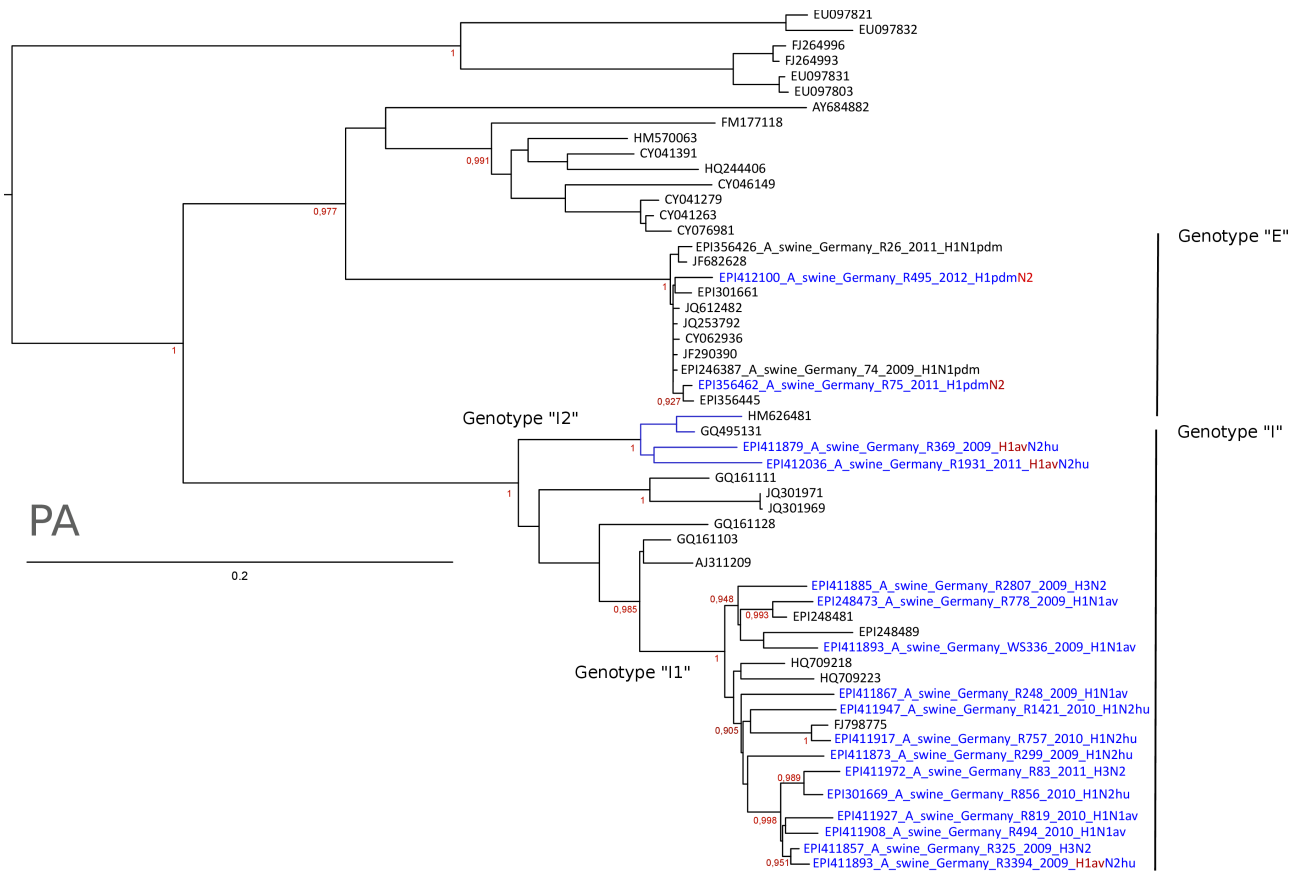

Supplemental figure 2D.

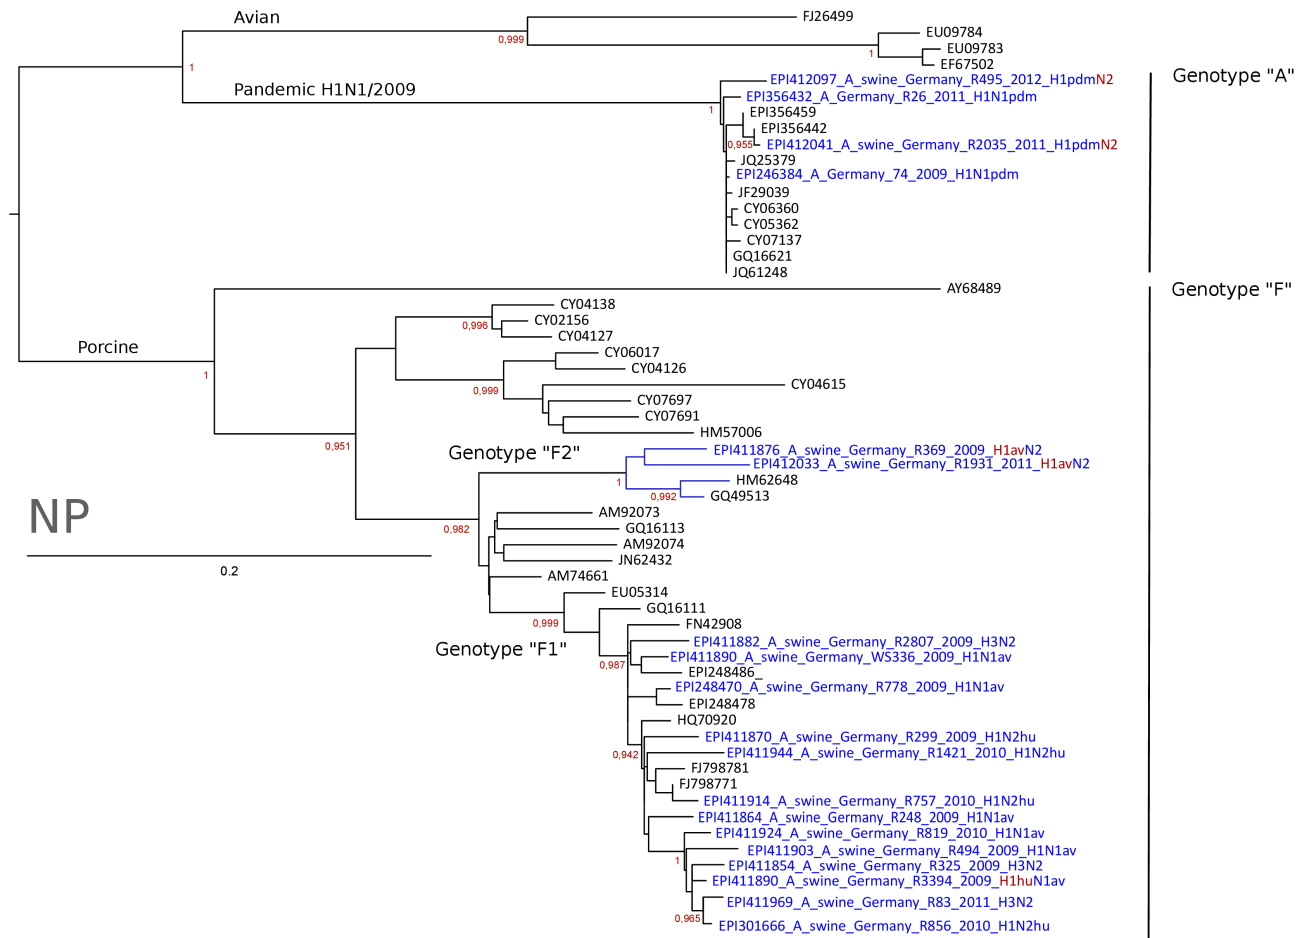

Supplemental figure 2E.

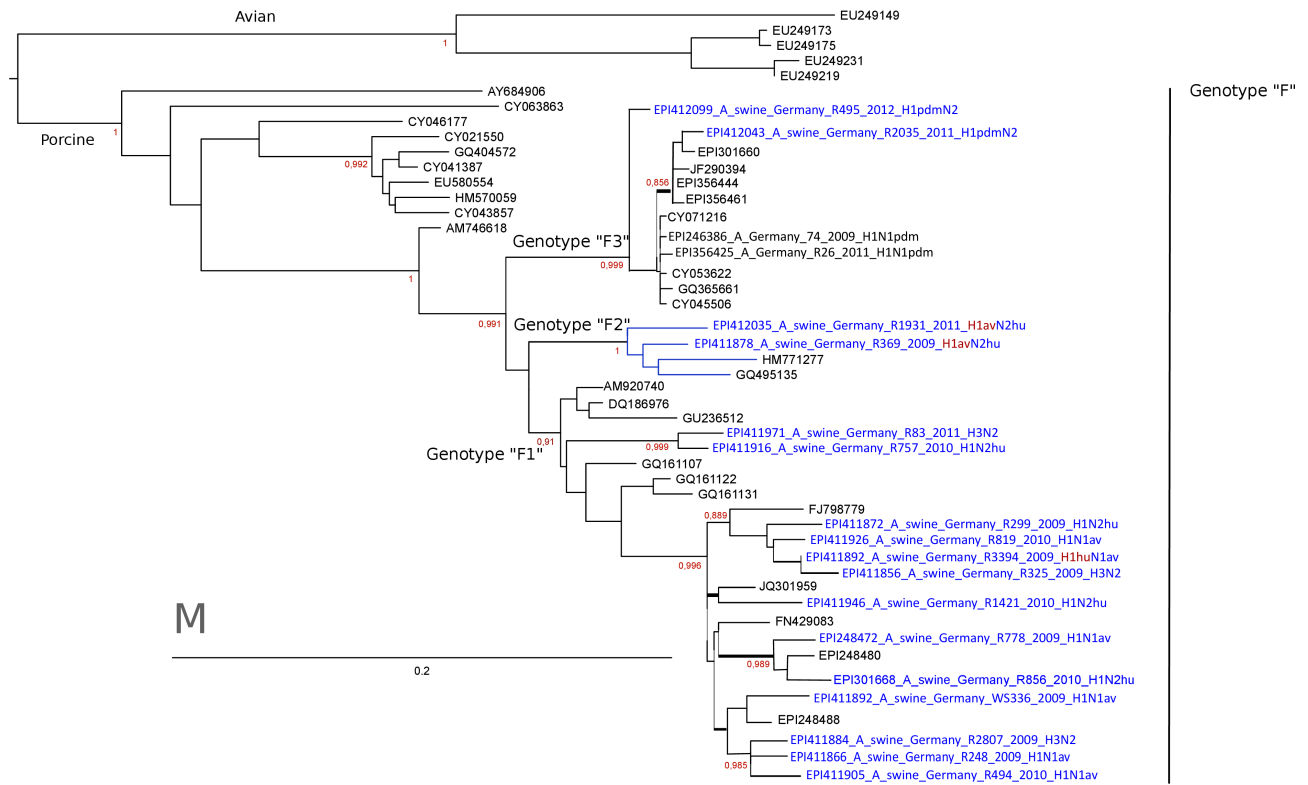

Supplemental figure 2F.

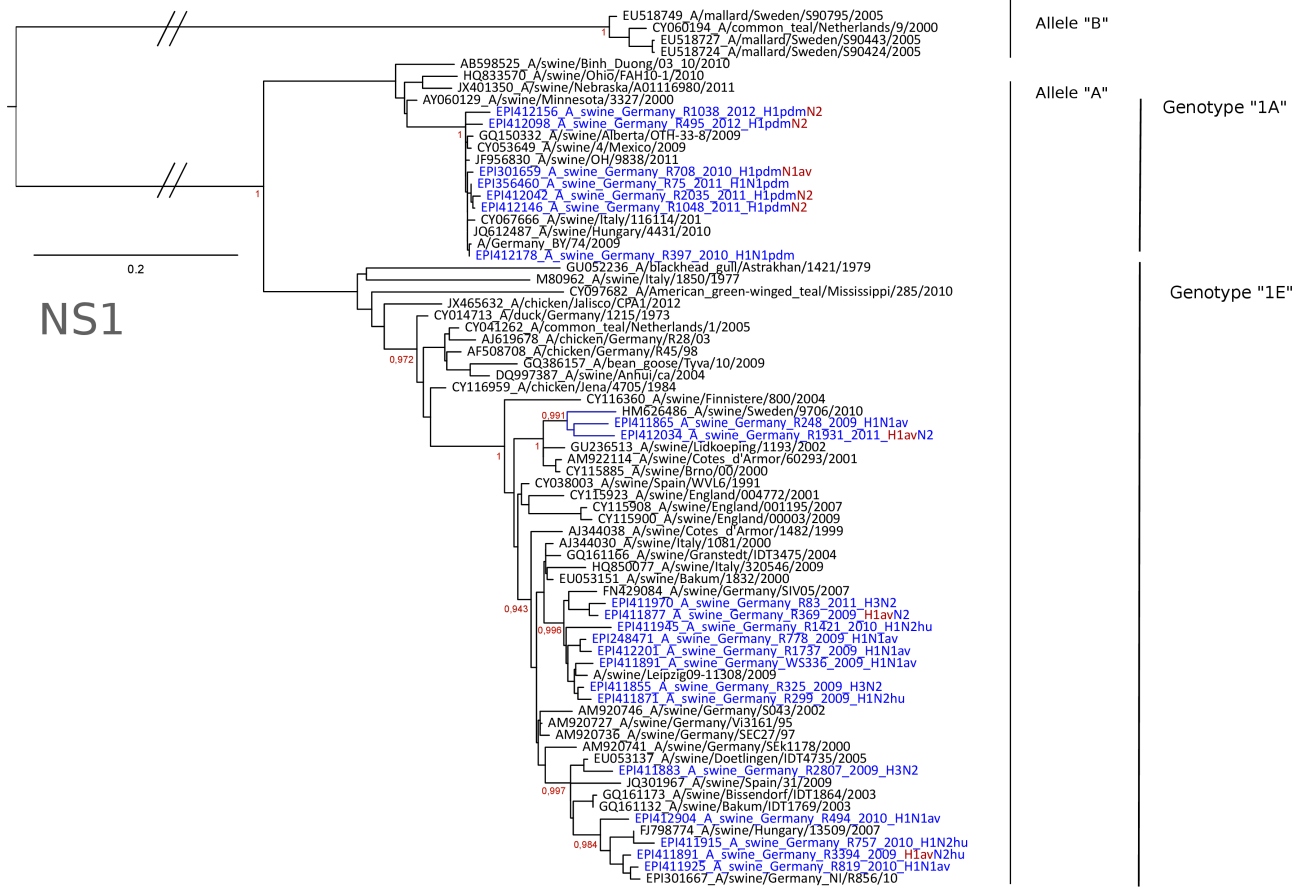



FB-Nr. \_\_\_\_\_

**Project: “SIV infection and reproductive disorders  
in sow herds“**

**Date of inquiry:** \_\_\_\_\_

**Lab-number of corresponding samples:**

---

**Veterinarian (name, first name)**

---

Zip code, city

---

**Farmer (name, first name)**

---

Zip code, city

Veterinarian: I declare that I approve that the collected data will be used for further analysis and publication by the Field Station of Epidemiology and that this will be done anonymously

yes

no

FB-Nr. \_\_\_\_\_

## I. Herd type and size

- Farrow-to-finish (slaughter pig market weight ca. 115 kg)
- Farrow-to-feed (piglet market weight 28 kg)
- Farrow-to-wean (piglet market weight 8 kg)

Increase in the number of sows since 2009

- yes                       no

Number of producing sows \_\_\_\_\_

Number of places for weaners \_\_\_\_\_

Number of places for fatteners \_\_\_\_\_

## II.1 Utilisation concept of the building with farrowing units

II.1.1 Which production stages are in the same building the farrowing units are?

[multiple answers possible]

- none
- nursery units
- fattening units
- gilt acclimatisation unit
- insemination centre
- gestating sow unit

## II.2 Management lactating sows and suckling pigs

II.2.1 Weaning age

- 21-22 days of age
- 23-24 days of age

FB-Nr. \_\_\_\_\_

- 25-26 days of age
- 26-27 days of age
- > 28 days

II.2.2 Batch farrowing system

- none
- 1 week
- 2 week
- 3 weeks
- 4 weeks
- other \_\_\_\_\_

II.2.3 All-in-all-out policy in the farrowing units

- yes
- no

II.2.4 Separate farrowing unit for sows that do not belong to a regular batch (e.g. after return to oestrus)

- yes
- no

II.2.5 Cross-fostering of suckling pigs (number of pigs)

- < 5 %
- 5 – 10 %
- > 10 %
- not specified

II.2.6 Disposition of runting or diseased piglets after weaning

- stay in the farrowing pen
- are moved to a pen for diseased pigs in the same unit

FB-Nr. \_\_\_\_\_

- are moved to a unit for diseased pigs
- euthanasia
- other (e.g. nurse) \_\_\_\_\_

FB-Nr. \_\_\_\_\_

### II.3 Management insemination centre

II.3.1 All-in-all-out policy in the insemination centre

yes

no

### II.4 Management gestating sows

II.4.1 All-in-all-out policy in the unit(s) of gestating sows

yes

no

II.4.2 Housing of the gestating sows

gestation crates

loose housing system

both

### II.5 Vaccination program - sows

| Vaccination against                                       | Yes | No | Vaccine | Herd vaccination* | Group vaccination** |
|-----------------------------------------------------------|-----|----|---------|-------------------|---------------------|
| SIV                                                       |     |    |         |                   |                     |
| PRRS                                                      |     |    |         |                   |                     |
| PCV2                                                      |     |    |         |                   |                     |
| Erysipelas                                                |     |    |         |                   |                     |
| Parvovirus                                                |     |    |         |                   |                     |
| Rhinitis atrophicans                                      |     |    |         |                   |                     |
| <i>E. coli/ Cl. perfringens</i>                           |     |    |         |                   |                     |
| Autogeneuous vaccines against <i>S. suis/ H. parasuis</i> |     |    |         |                   |                     |
| Other                                                     |     |    |         |                   |                     |

\* Vaccination of the entire sow herd at one time; \*\* vaccination of batches of sows at a specified time of the reproduction cycle (e.g. during mid-gestation or suckling period)

## II.6 Vaccination program - piglets

| Vaccination against             | Yes | No |
|---------------------------------|-----|----|
| SIV                             |     |    |
| PRRS                            |     |    |
| PCV2                            |     |    |
| <i>Mycoplasma hyopneumoniae</i> |     |    |
| Ileitis                         |     |    |

## III. Management gilts

### III.1 Replacement gilts

#### III.1.1 Origin

- self recruitment
- purchase

If purchased:

#### III.1.2 Quarantine/Acclimatisation

- yes
- no

If yes:

#### III.1.3 Duration of quarantine/acclimatisation period

- ≤ 5 weeks
- 6-7 weeks
- ≥ 8weeks
- not specified

#### III.1.4 Nose-to-nose-contact to older sows during acclimatisation

- yes
- no

FB-Nr. \_\_\_\_\_

FB-Nr. \_\_\_\_\_

### III.1.5 Site of the acclimatisation barn

- separate location
- separate building but same location as farrowing barn
- separate unit in the farrowing barn

### III.2 Vaccination program - gilts

| Vaccination against  | Yes | No |
|----------------------|-----|----|
| SIV                  |     |    |
| PRRS                 |     |    |
| PCV2                 |     |    |
| Erysipelas           |     |    |
| Parvovirus           |     |    |
| Rhinitis atrophicans |     |    |
| Glässer Disease      |     |    |



FB-Nr. \_\_\_\_\_

#### IV. Course of the disease

##### IV.1 When (prior to sample submission) did the disease in the sow herd start?

- 1-3 weeks
- ≥ 3 weeks
- not specified

##### IV.2 Which sows were affected?

- only ≥ 2<sup>nd</sup> parity sows
- only first litter sows
- both
- not specified

##### IV.3 Occurrence of reproductive disorders?

[multiple answers possible]

| Reproduction stage                                          | Yes | No |
|-------------------------------------------------------------|-----|----|
| 1-23 days of gestation<br>(return to oestrus)               |     |    |
| 24-38 days of<br>gestation (return to<br>oestrus/abortion)  |     |    |
| 39-60 days of<br>gestation (return to<br>oestrus/abortion)  |     |    |
| 61-100 days of<br>gestation (return to<br>oestrus/abortion) |     |    |
| > 100 days of<br>gestation (abortion)                       |     |    |
| Birth of stillborn/ weak<br>born piglets                    |     |    |
| No reproductive<br>disorders                                |     |    |

##### IV.4 Which other clinical symptoms appeared in sows?

FB-Nr. \_\_\_\_\_

[multiple answers possible]

- fever > 40,0°C
- under temperature < 37,5 °C
- reduced feed intake
- anorexia
- apathy
- cough
- nasal discharge and/or sneezing
- laboured breathing
- cyanosis
- sudden death
- no clinical symptoms
